# Supplementary material for: Satisfaction with remote teaching during the first semester of the COVID-19 crisis: Psychometric properties of a scale for health students
Source: PLOS journal article supplement (doi:10.1371/journal.pone.0250739), 2021-04-28
Supplement: S2 (10.1371/journal.pone.0250739.s002) [file journal.pone.0250739.s002]

**S2 Table. Remote Teaching Satisfaction Scale (Proposed English version)**

| Please indicate the choice than better describe how satisfied you felt with the training process developed online during this first term of 2020. |                |                   |          |                            |       |                |             |
|---------------------------------------------------------------------------------------------------------------------------------------------------|----------------|-------------------|----------|----------------------------|-------|----------------|-------------|
|                                                                                                                                                   | Fully disagree | Strongly disagree | Disagree | Neither agree nor disagree | Agree | Strongly agree | Fully agree |
| 1. I am learning to apply the themes presented in the courses in an autonomous way                                                                | 0              | 1                 | 2        | 3                          | 4     | 5              | 6           |
| 2. The activities carried out in the courses are useful to achieve the expected learnings.                                                        | 0              | 1                 | 2        | 3                          | 4     | 5              | 6           |
| 3. Diverse activities are used in the courses to achieve the expected learnings.                                                                  | 0              | 1                 | 2        | 3                          | 4     | 5              | 6           |
| 4. The courses activities favor cooperation among the students.                                                                                   | 0              | 1                 | 2        | 3                          | 4     | 5              | 6           |
| 5. Assessment activities are coherent with the purposes of the courses.                                                                           | 0              | 1                 | 2        | 3                          | 4     | 5              | 6           |
| 6. Assessment activities are an opportunity to continue learning                                                                                  | 0              | 1                 | 2        | 3                          | 4     | 5              | 6           |
| 7. Feedback during the courses has helped learnings.                                                                                              | 0              | 1                 | 2        | 3                          | 4     | 5              | 6           |
| 8. Online interaction opportunities help my learning.                                                                                             | 0              | 1                 | 2        | 3                          | 4     | 5              | 6           |
| 9. Teachers have established a cordial relationship with the students.                                                                            | 0              | 1                 | 2        | 3                          | 4     | 5              | 6           |
| 10. The courses teachers have previously asked about the quality of our Access to the Internet.                                                   | 0              | 1                 | 2        | 3                          | 4     | 5              | 6           |
| 11. The courses' teachers have previously asked about our technological equipment (e.g. computers. tablet. etc.) availability.                    | 0              | 1                 | 2        | 3                          | 4     | 5              | 6           |
| 12. The course teachers have asked about our personal situation.                                                                                  | 0              | 1                 | 2        | 3                          | 4     | 5              | 6           |

|                                                                                         |   |   |   |   |   |   |   |
|-----------------------------------------------------------------------------------------|---|---|---|---|---|---|---|
| 13. Students have felt respected by the teachers during the courses.                    | 0 | 1 | 2 | 3 | 4 | 5 | 6 |
| 14. Courses are motivating.                                                             | 0 | 1 | 2 | 3 | 4 | 5 | 6 |
| 15. The course activities have a sequence that helps learning.                          | 0 | 1 | 2 | 3 | 4 | 5 | 6 |
| 16. The times destined to the course activities are sufficient to achieve learnings.    | 0 | 1 | 2 | 3 | 4 | 5 | 6 |
| 17. Synchronic activities (in vivo) are carried out in coordinated times among courses. | 0 | 1 | 2 | 3 | 4 | 5 | 6 |
| 18. I have taken pains to fully understand the themes presented in the courses.         | 0 | 1 | 2 | 3 | 4 | 5 | 6 |
| 19. I have asked every time I had doubts about the themes of the courses.               | 0 | 1 | 2 | 3 | 4 | 5 | 6 |
| 20. I have searched for additional information to understand the themes of the courses. | 0 | 1 | 2 | 3 | 4 | 5 | 6 |
| 21. I have completed the tasks assigned in the courses in due time.                     | 0 | 1 | 2 | 3 | 4 | 5 | 6 |
| 22. The platforms employed allow to satisfactorily carry out the course activities.     | 0 | 1 | 2 | 3 | 4 | 5 | 6 |
